# Supplementary material
Source: PubMed Central journal article supplement (PMC1933401)
Supplement: 7601770s1.pdf [file 7601770s1.pdf]

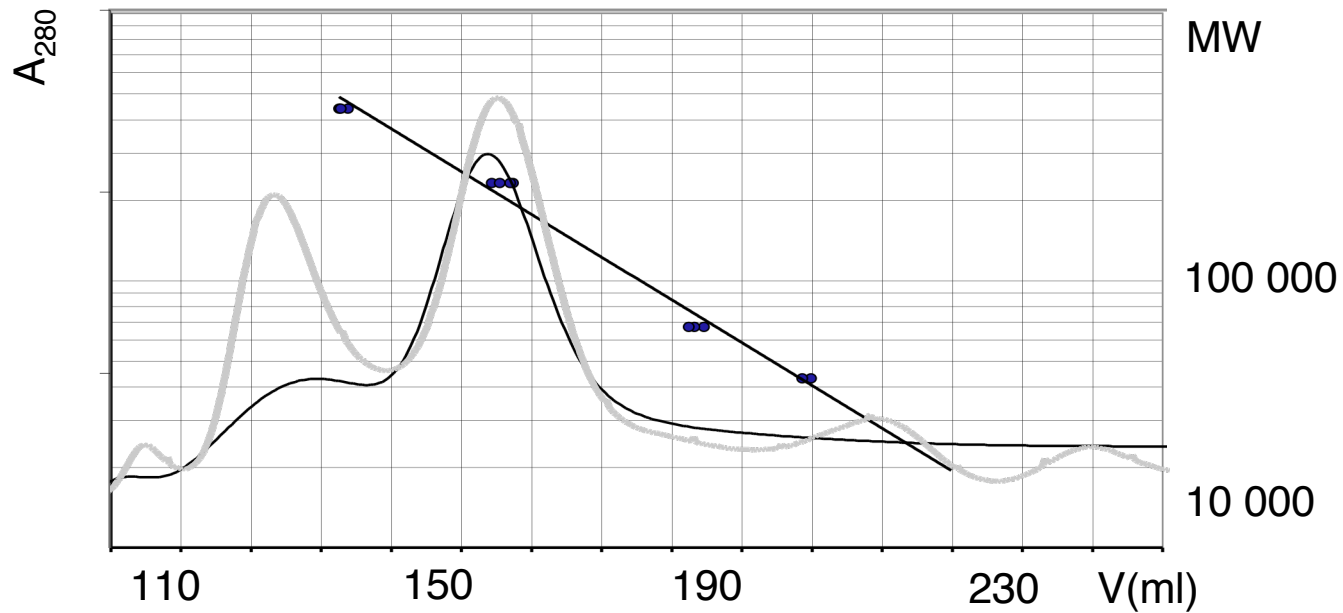

**Supplementary Figure 1. Gel filtration experiments of *RpBphP4* from CEA001.**

Elution profiles of gel filtration experiments carried out with the double mutant C472S-C722S of achromo-*RpBphP4* in 50 mM NaCl, 20 mM Tris-HCl pH 8.0 in the absence (grey curve) or in the presence (dark curves of 10 mM DTT). A superimposed standard curve was calculated using the known molecular mass of four protein standards (black circles).
