# Supplementary material
Source: PubMed Central journal article supplement (PMC1933401)
Supplement: 7601770s2.pdf [file 7601770s2.pdf]

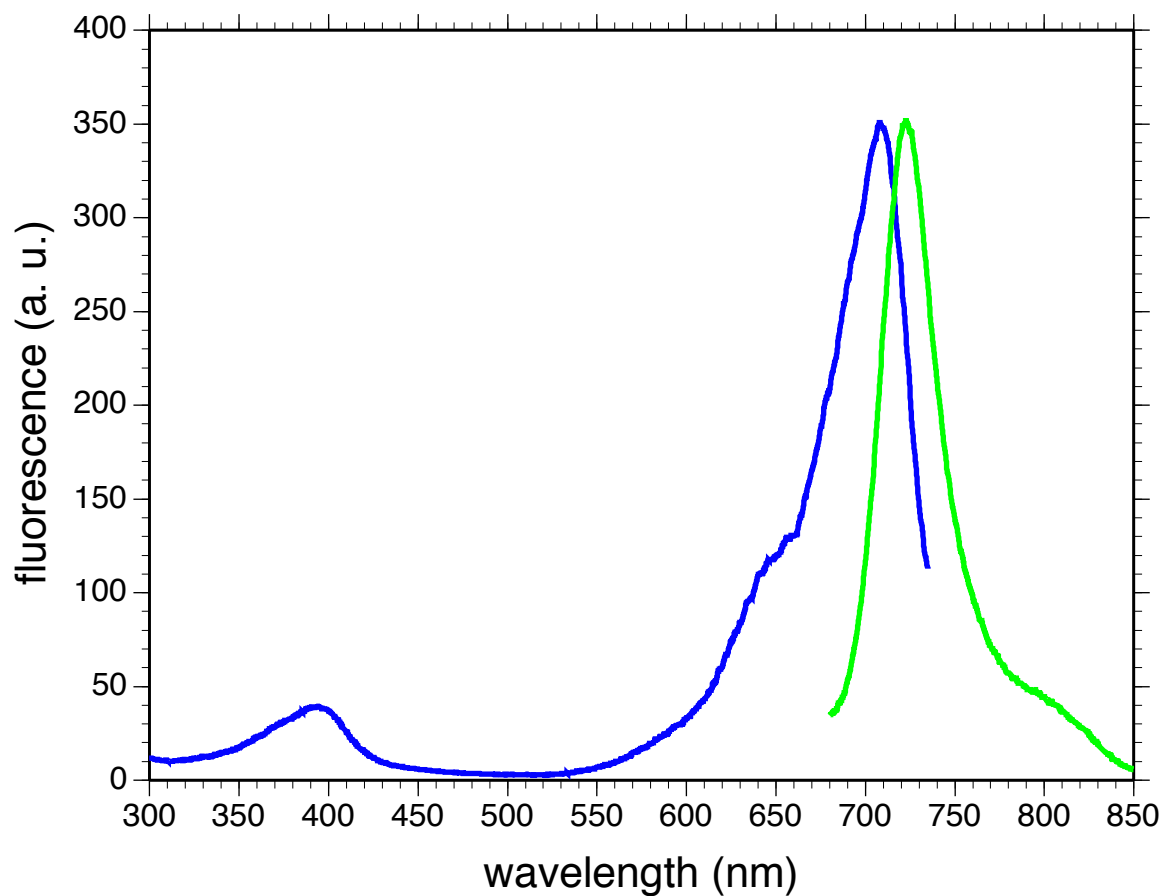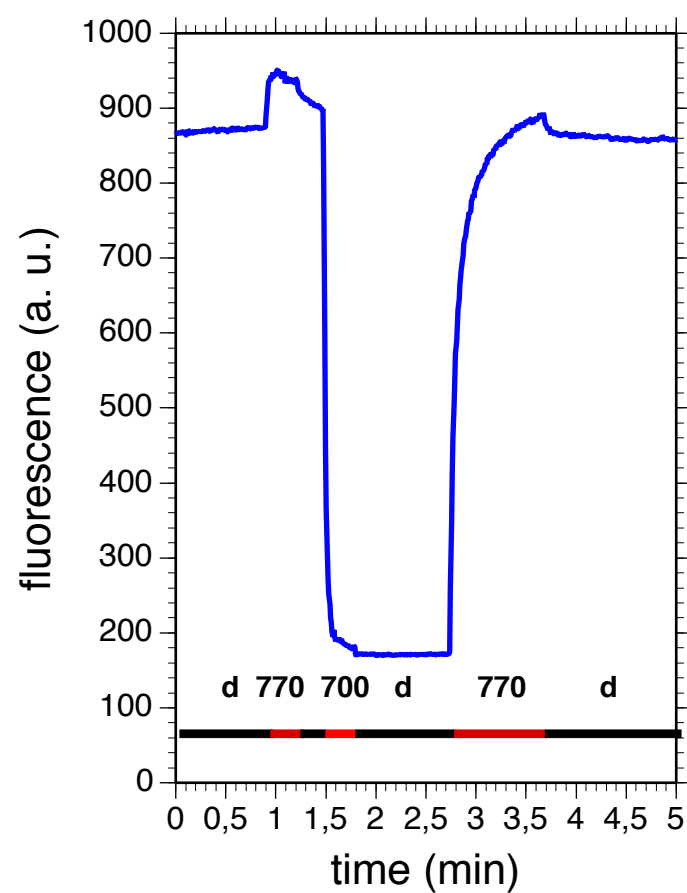

**Supplementary Figure 2. Fluorescence properties of chromo-*RpBphP4* of BisB5.**

Left part: Excitation(blue) and emission (green) spectra recorded at room temperature.

Right part: Fluorescence kinetics following a series of dark and light periods. The sample was placed in the dark for 15 min after a 770 nm illumination and was subsequently subjected to 20 s illumination with 770 nm light, 20 s of dark (d), 20 s of 700 nm illumination, 1 min of dark, 1 min of 770 nm light and then dark. The excitation and emission wavelengths were 390 nm and the 720 nm, respectively.
