# Supplementary material
Source: PubMed Central journal article supplement (PMC1933401)
Supplement: 7601770s3.pdf [file 7601770s3.pdf]

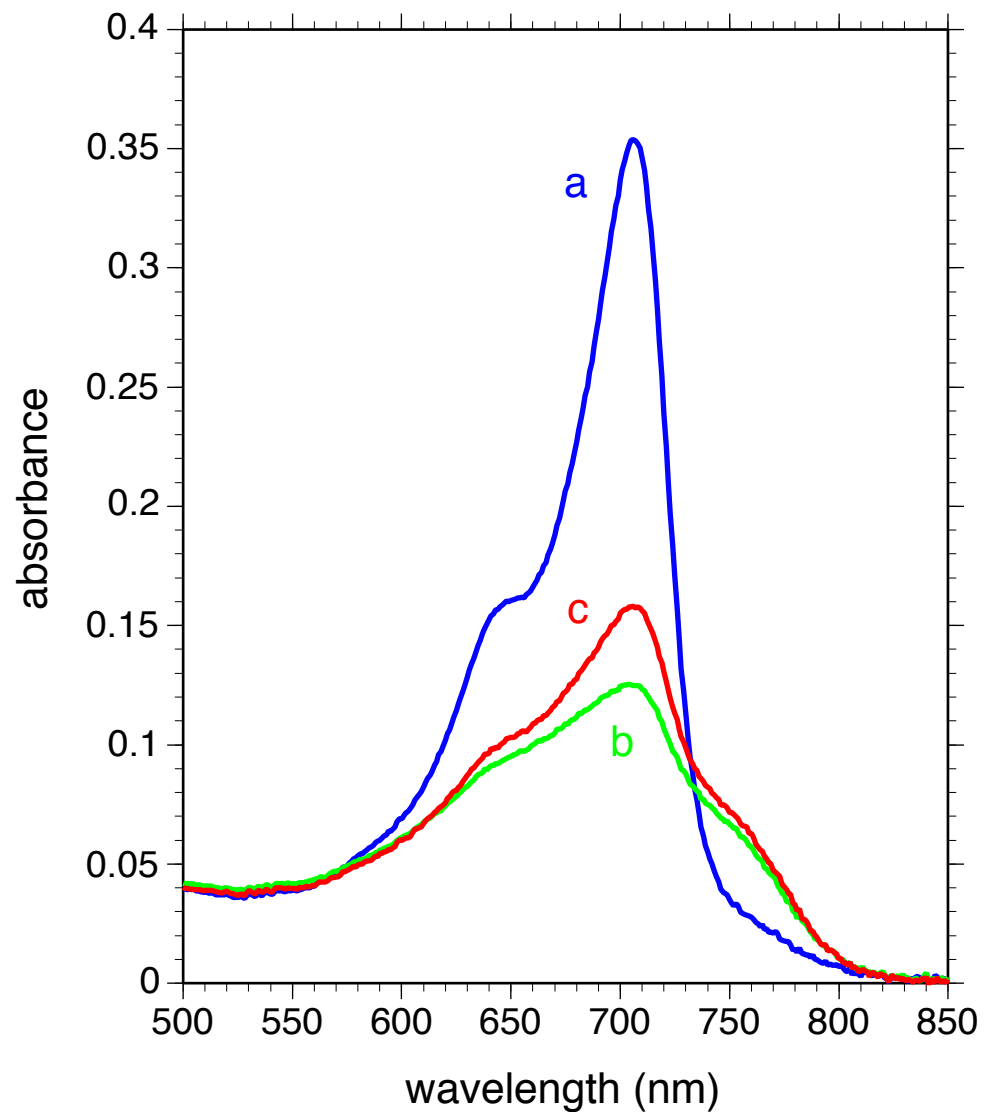

**Supplementary Figure 3. Absorption spectra of purified HaA2 RpBphP4.**

Spectrum a (blue line) recorded 5 min after 770 nm illumination; spectrum b (green line) during a 705 nm illumination and spectrum c (red line) during illumination by both 705 and 770 nm light.
