# Supplementary material
Source: PubMed Central journal article supplement (PMC1933401)
Supplement: 7601770s4.pdf [file 7601770s4.pdf]

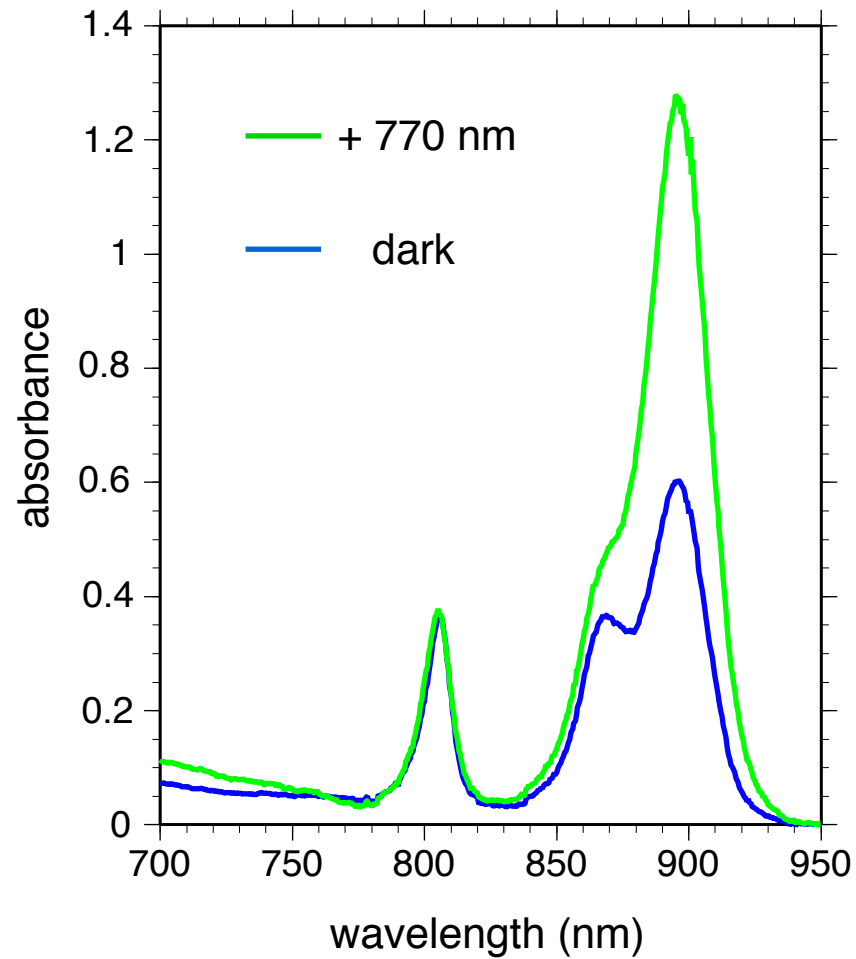

**Supplementary Figure 4. Effect of light on the synthesis apparatus for WT and PpsR1 mutants of strain CEA001.**

Absorption spectra recorded at 77K of intact cells of CEA001 grown at 1% oxygen tension in the dark (blue spectrum) or under 770 nm (green spectrum) illumination.
